# Supplementary material for: The effect of taxonomic classification by full-length 16S rRNA sequencing with a synthetic long-read technology
Source: PubMed Central journal article supplement (PMC7814050; doi:10.1038/s41598-020-80826-9), 2021-01-18
Supplement: 41598_2020_80826_MOESM4_ESM.pdf [file 41598_2020_80826_MOESM4_ESM.pdf]

Proportions

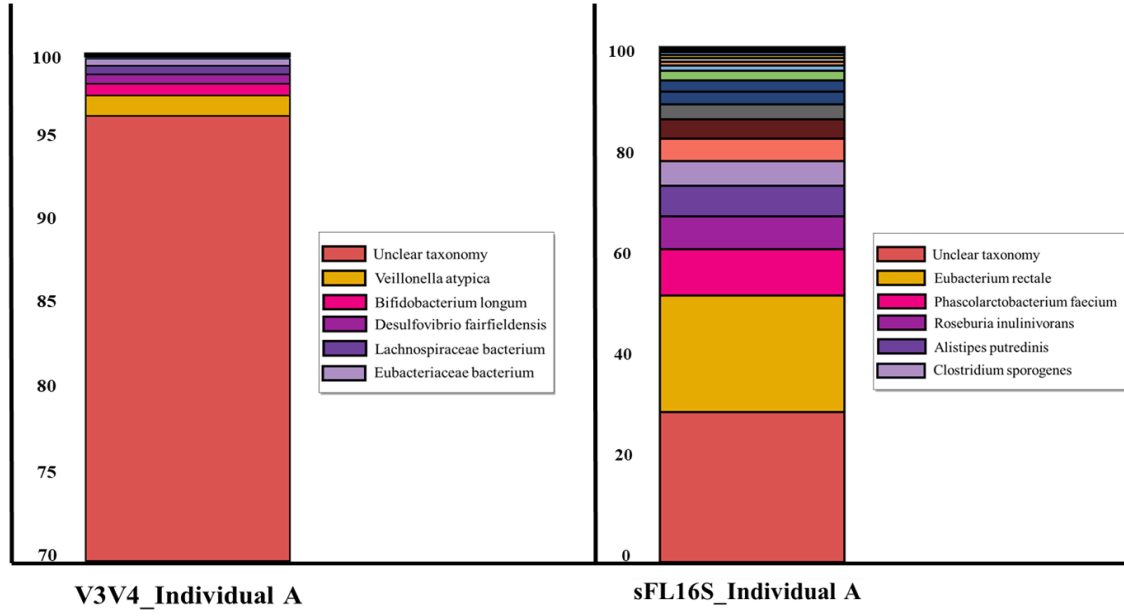

Proportions

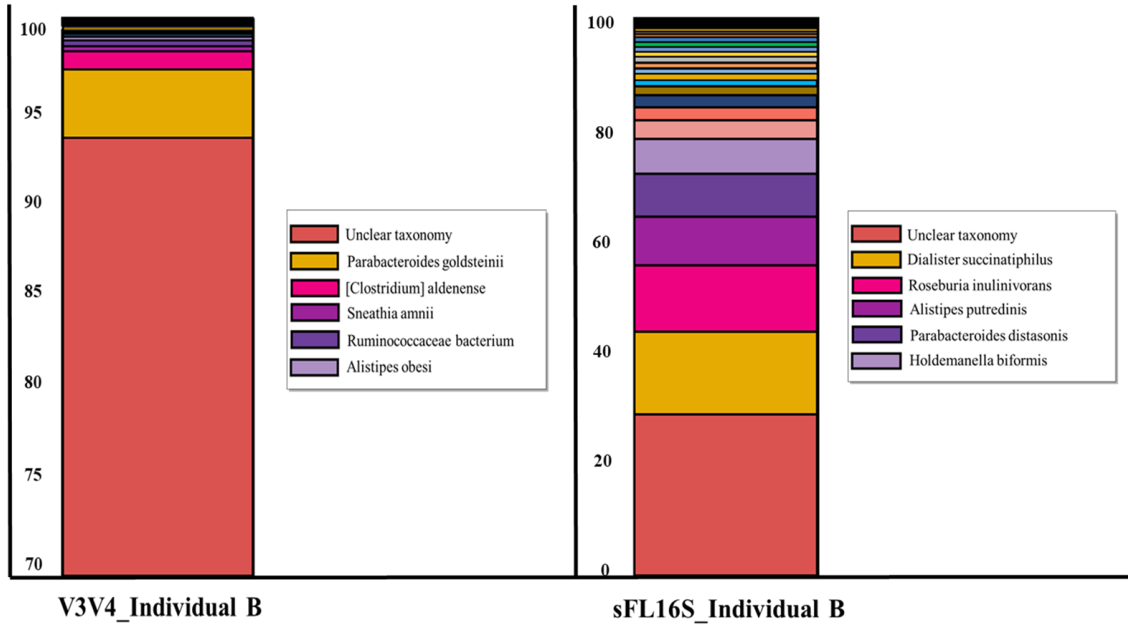

Proportions

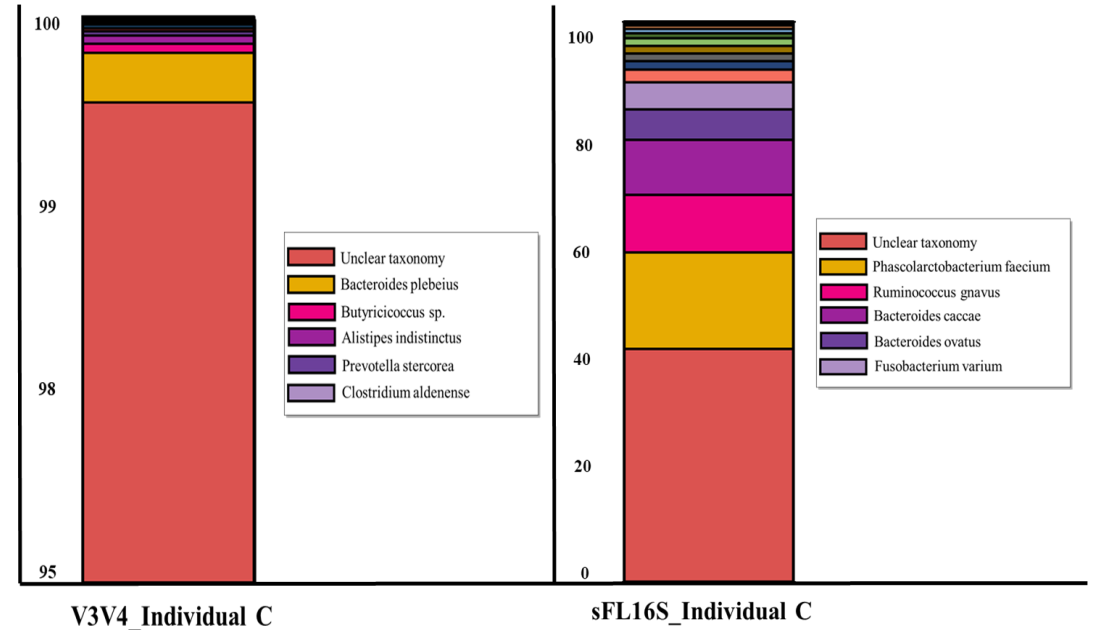

Supplementary Figure S3.
