# Supplementary material for: The effect of taxonomic classification by full-length 16S rRNA sequencing with a synthetic long-read technology
Source: PubMed Central journal article supplement (PMC7814050; doi:10.1038/s41598-020-80826-9), 2021-01-18

a

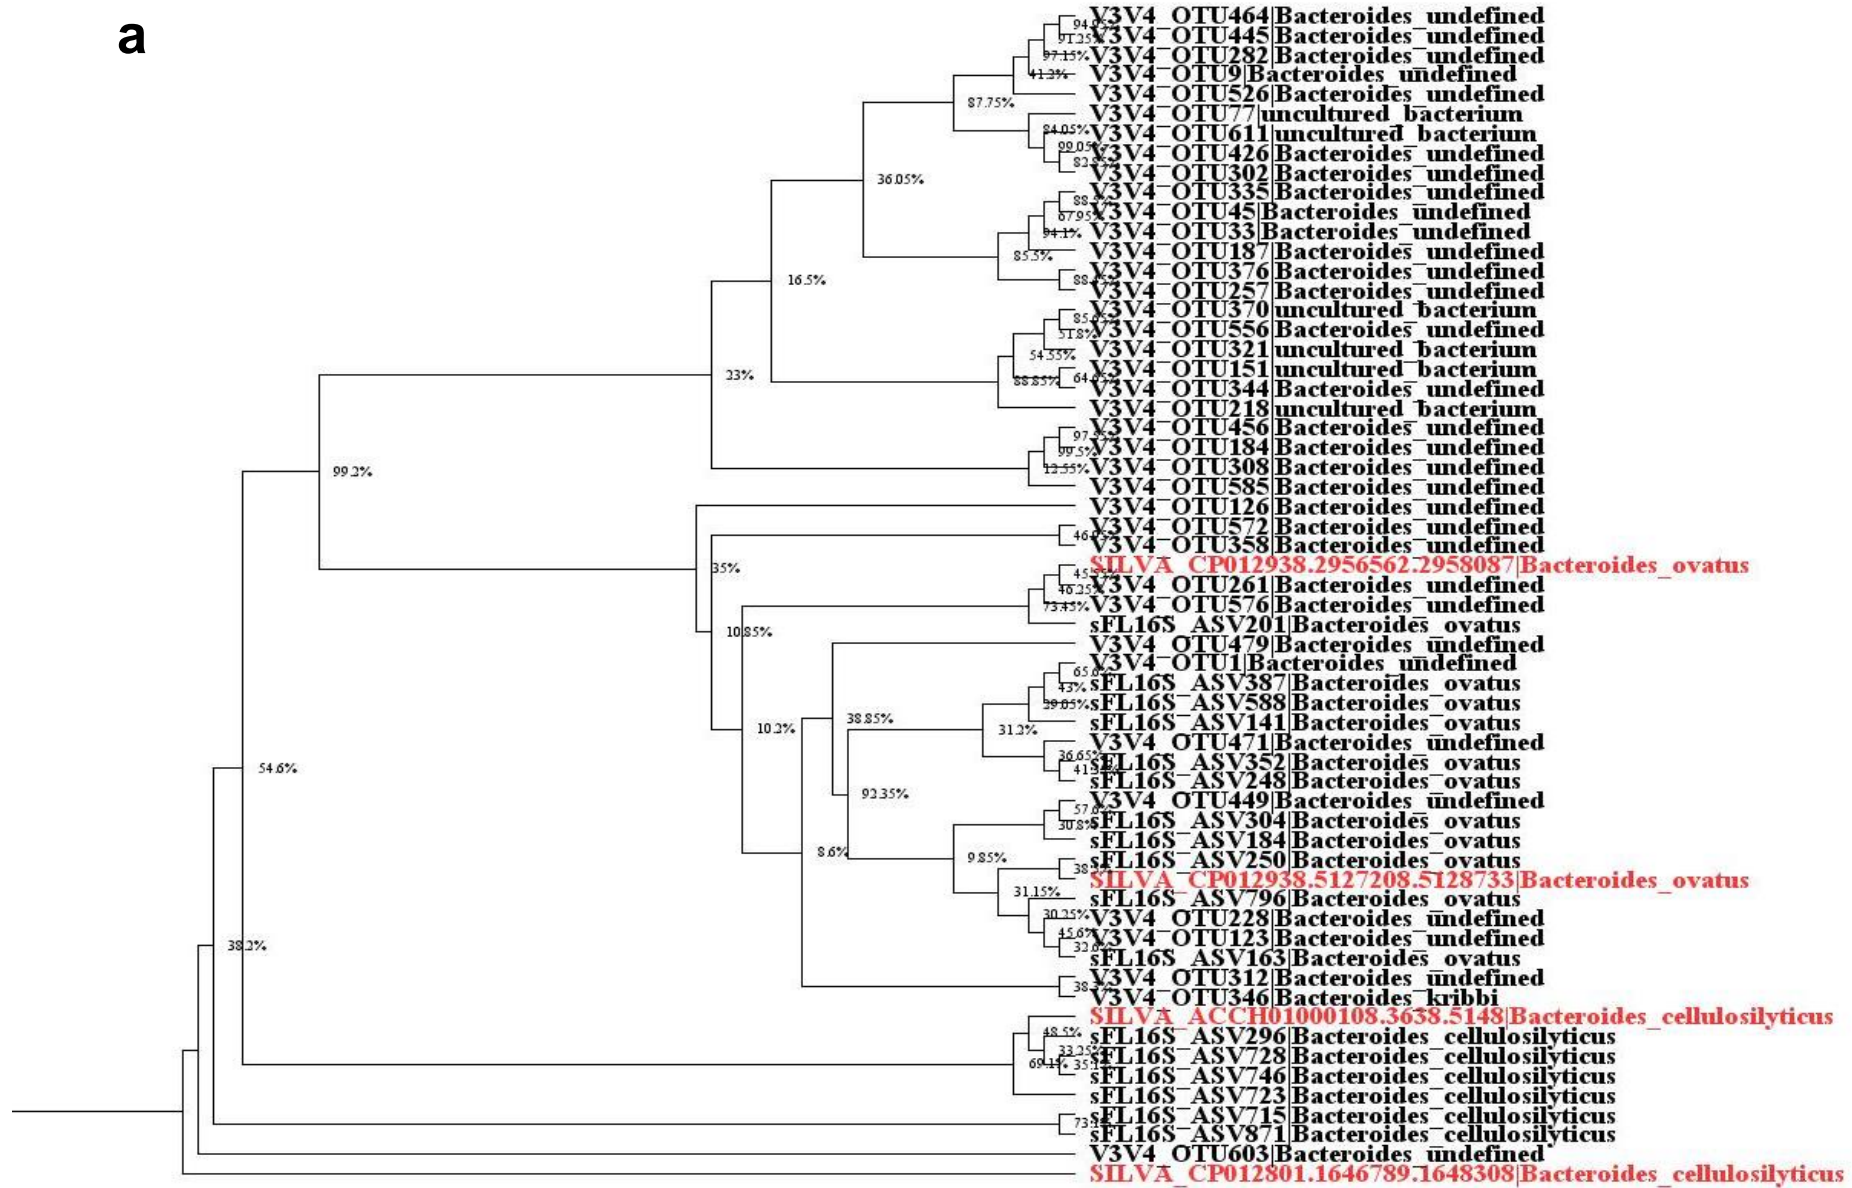

b

NCBI Multiple Sequence Alignment Viewer, Version 1.16.1

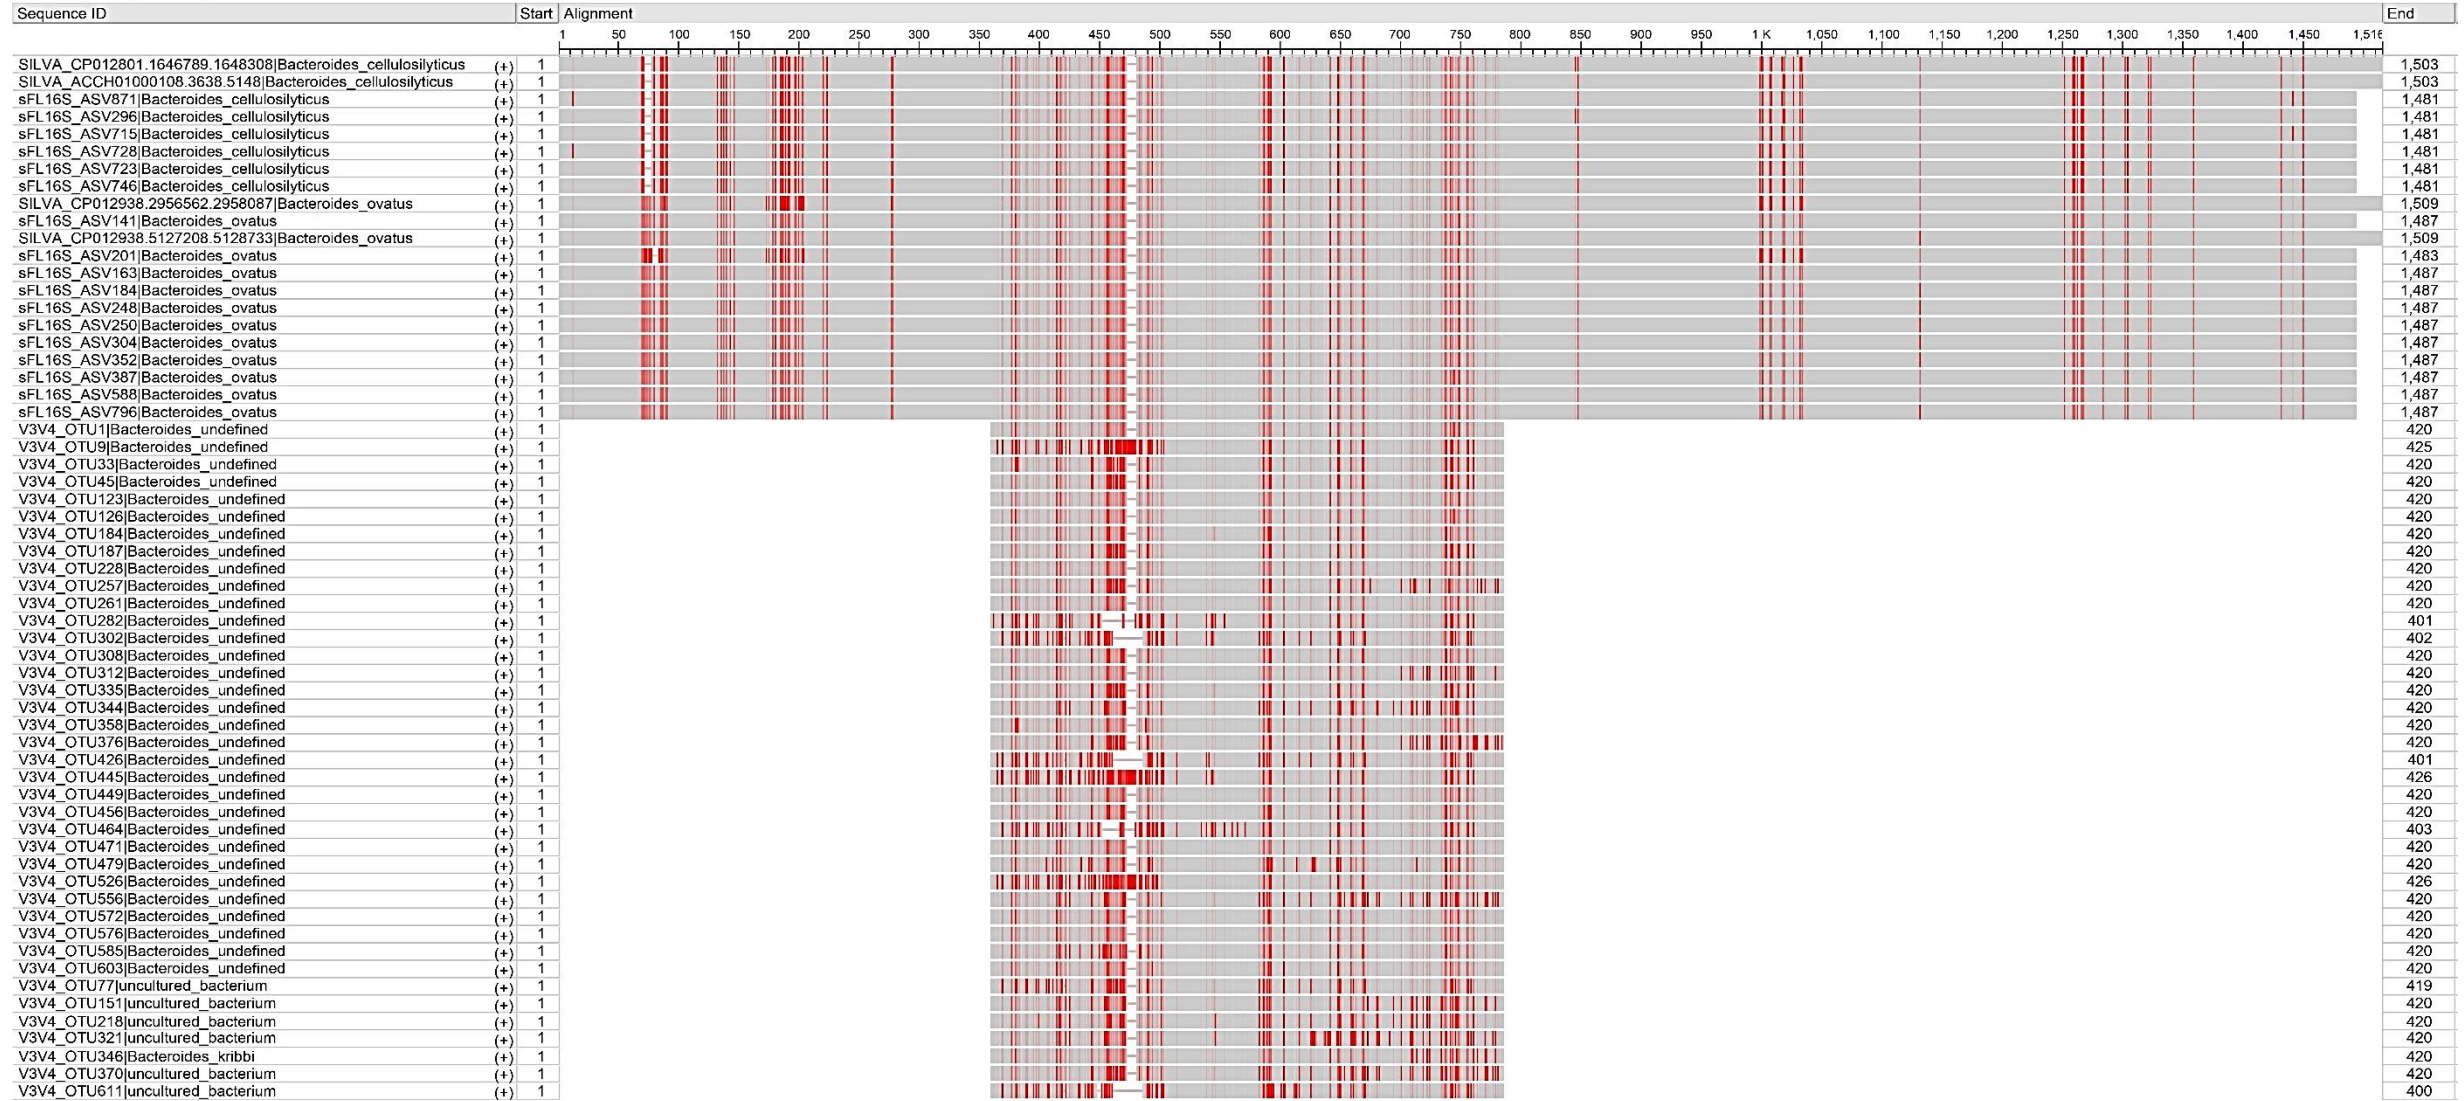

**c**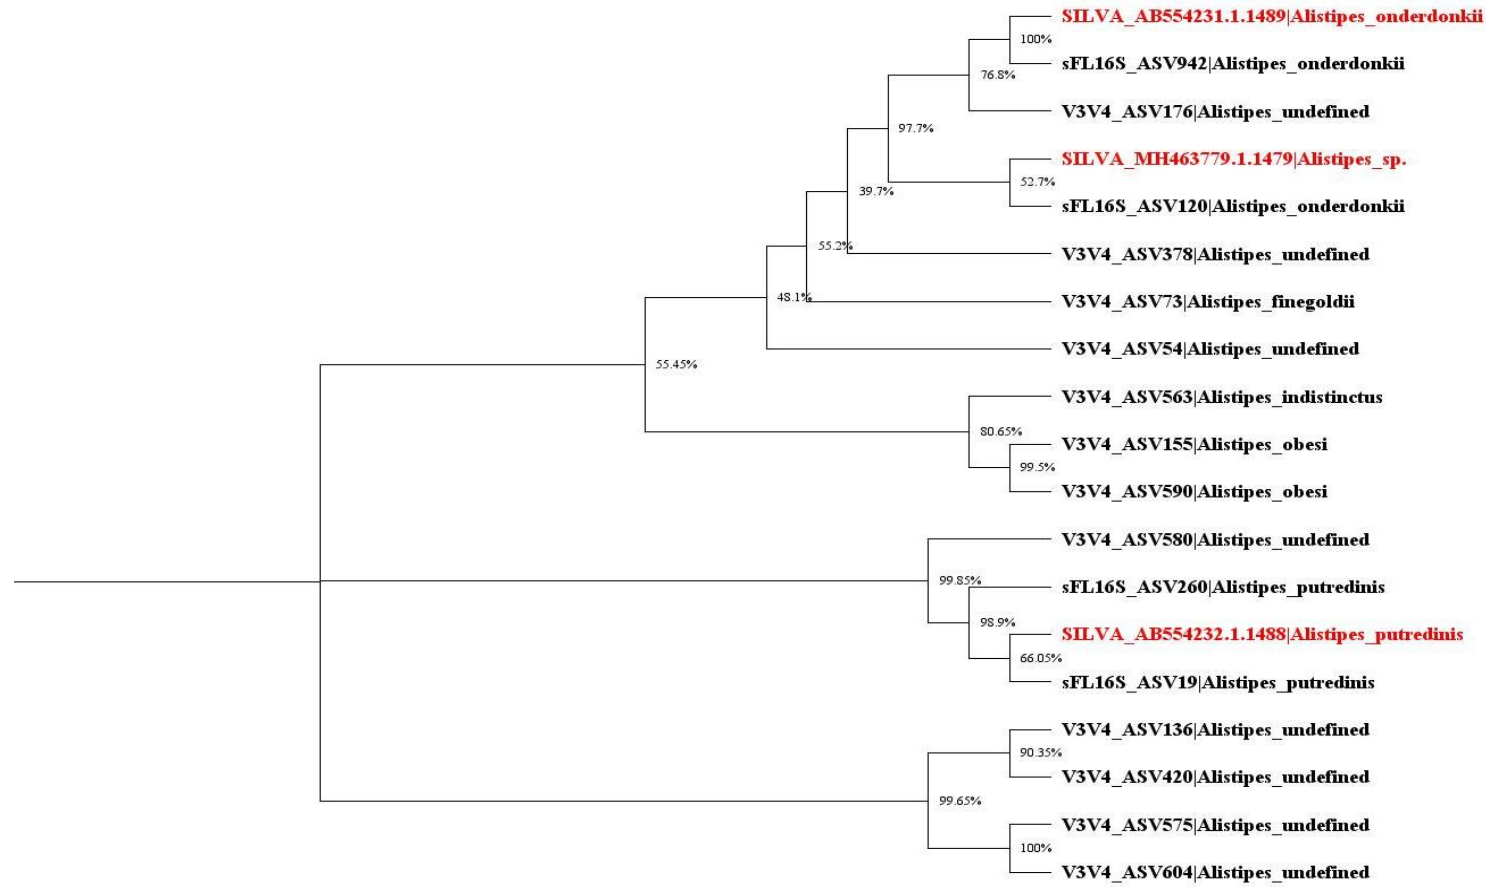**d**

NCBI Multiple Sequence Alignment Viewer, Version 1.16.1

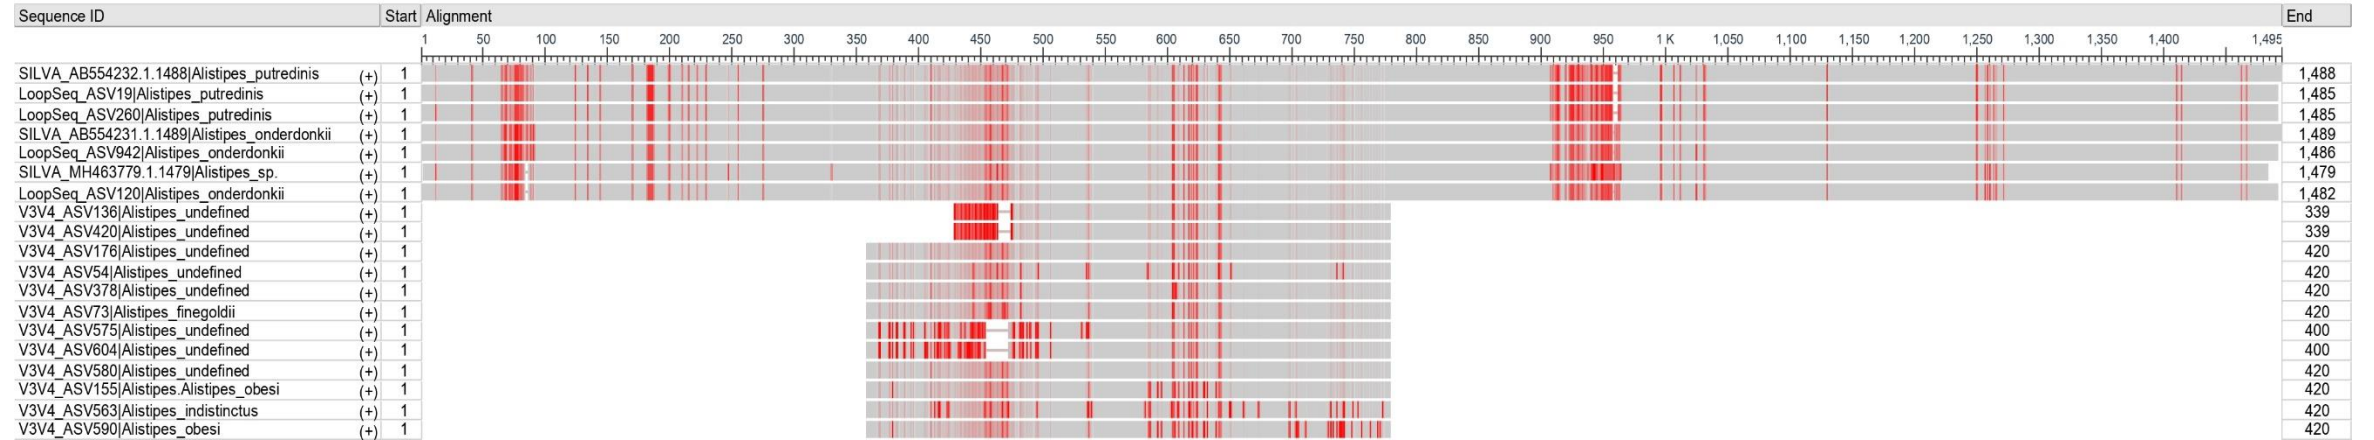

Supplement: 41598_2020_80826_MOESM5_ESM.pdf [file 41598_2020_80826_MOESM5_ESM.pdf]
